# Supplementary material for: SNP Data Quality Control in a National Beef and Dairy Cattle System and Highly Accurate SNP Based Parentage Verification and Identification
Source: Front Genet. 2018 Mar 15;9:84. doi: 10.3389/fgene.2018.00084 (PMC5862794; doi:10.3389/fgene.2018.00084)
Supplement: Table S7 — Inheritance analysis of patterners of 625,384 chromosome Y SNP containing females. [file Table7.XLSX]

## Sheet: Sheet1
Table S7. Inheritance analysis of patterners of 625,384 chromosome Y SNP containing females.
ID	Sire_ID	Dam_ID	sex	#chrY1	sire_#chrY2	dam_#chrY3
187900302	108375956	187900344	F	1
190803398	115804738	190803300	F	1
275608030	181277479	181277850	F	1
299809306	192060587	192060398	F	1
319442104	181331820	181332000	F	1
350012005	108372838	186663334	F	1
356717223	108379011	192103030	F	1
361214962	72449364	273074508	F	1		0
368060756	186018186	186018088	F	1
377986274	274957628	184083508	F	1
388012285	373095210	347064747	F	1
390899239	108373276	386671231	F	1
393410875	273128907	399745089	F	1
404002474	311587953	248593245	F	1
410613700	108381628	368595286	F	1
412226374	269528581	269528655	F	1
415231036	.	123907575	F	1
417757541	.	417757579	F	1
438639578	439110639	415031732	F	1
439673816	108381628	439673826	F	1
451612428	108375564	186488015	F	1
452837321	273013297	131474196	F	1
453109410	131275392	443421108	F	1
461191597	.	441796605	F	1
468717091	108376528	187931167	F	1
469464817	327391605	327391482	F	1
475795282	427663336	475795278	F	1
492024440	.	147113063	F	1
495688976	142902799	391889438	F	1
504331390	.	380549295	F	1
505629688	108374725	449406910	F	1
506335559	.	356254743	F	1
506892865	108379302	401785376	F	1
506901812	108375618	354364679	F	1
508077139	108379114	261515641	F	1
508473077	358039616	187786632	F	1
512025086	108377992	116941572	F	1
514349179	108376528	407707648	F	1
515203240	.	343464548	F	1
515538340	294577835	417507657	F	1
516124369	108375564	190774920	F	1
516722453	344800083	351751646	F	1
516740806	186528192	364463842	F	1
520963958	184084210	273043936	F	1
522613221	.	438805162	F	1
523044596	352581240	327391491	F	1
523062492	186528192	273113032	F	1
523527699	181363044	183619636	F	1
523528171	69091855	384272297	F	1	7
525062953	181366250	181277593	F	1
526711659	366898846	186679745	F	1
532773374	108373262	470966448	F	1
534242002	108381087	181335340	F	1
538322460	.	538322425	F	1
539013595	.	76295251	F	1
539860411	368347814	399274650	F	1		0
539972308	108379179	184121547	F	1
540400680	163371932	186511497	F	1
544422860	.	544424010	F	1
545087468	108379320	184268736	F	1
545193099	.	545217024	F	1
545511621	.	545512603	F	1
545535628	.	545535634	F	1
545864346	.	545864347	F	1
546150609	.	123963527	F	1
546436548	108376452	546456634	F	1
546438228	.	546461020	F	1
546445580	.	359603920	F	1
546795487	108379137	324635366	F	1
546935719	108900376	181379014	F	1
547870152	108374518	546908059	F	1
548301895	.	548301911	F	1
548322983	273087651	548322978	F	1
548754816	108379216	548754815	F	1
548778687	.	548778446	F	1
550170437	.	550170453	F	1
550190216	.	187801182	F	1
550194338	.	550210314	F	1
551086186	.	551106666	F	1
551657380	108378313	551657407	F	1	7
552347300	.	552380671	F	1
552347329	.	552347335	F	1
552809580	262663708	551733293	F	1
554565402	.	544644721	F	1
555042527	108376151	121593216	F	1	7
555048076	254834177	327721821	F	1
556348638	273165018	556348639	F	1
557507148	273024818	546896143	F	1
558631036	.	558647508	F	1
560113372	108381058	452379133	F	1
560647345	186537698	186537590	F	1
560650456	.	316041904	F	1
562098652	388846952	343542824	F	1
563019923	108372864	563069051	F	1
563600476	419164273	419164287	F	1
563606710	146260687	448167649	F	1
564349611	.	396391528	F	1
565512277	428090840	442905015	F	1
565622179	.	565622166	F	1
565630184	.	217659384	F	1
568626542	375215803	334794256	F	1
568644899	298920496	181362883	F	1
568996393	390894597	560752965	F	1
569006988	273037832	548319377	F	1
569625572	181276157	352363338	F	1
569634551	155520008	71288260	F	1
569772936	.	569770790	F	1
571503406	186528192	186508784	F	1
571503984	410356658	441394904	F	1
571509563	184219652	82705282	F	1
571935191	.	403776390	F	1
571935649	325370272	587439022	F	1
573988117	551649686	399862885	F	1
574003865	.	71132680	F	1
574006403	.	400421205	F	1
574104037	.	574114057	F	1
574542467	.	449934217	F	1
574551321	356257585	395900305	F	1
575348559	77923936	412448843	F	1
575544441	.	471937490	F	1
576541576	273114430	536127317	F	1
576542229	273114430	512571186	F	1
576609855	.	576607648	F	1
577192477	393836872	512571349	F	1
577609656	560222935	547875398	F	1
577612835	439670231	546873146	F	1
577618091	69092068	546925980	F	1
577714810	.	577714845	F	1
578157797	514771896	368595299	F	1	6
578691925	282671746	448841692	F	1
579416303	.	579417875	F	1
579880215	390927357	553319112	F	1
579884807	186537698	186537773	F	1
580176566	354884395	551676516	F	1
580183899	108374763	456508193	F	1
580413172	.	457578100	F	1
580678511	181271651	550138816	F	1
580956792	181400423	545209666	F	1
580962051	278498889	446137648	F	1
581239398	190822027	256086408	F	1
581241096	399743723	174949287	F	1
581241759	394710601	465467817	F	1
581724206	569777228	564368409	F	1
581734336	.	555538228	F	1
581736763	.	562351298	F	1
581739508	.	405531498	F	1
582006075	.	422843786	F	1
582011378	363341631	390898913	F	1
582278218	446701668	357399636	F	1
582559303	261513737	557026896	F	1
582564743	.	476377713	F	1
583046632	108380106	413537213	F	1
583577440	440837582	272918670	F	1
583865539	559682414	552827712	F	1
583869506	108377526	69555799	F	1
583876383	.	450873852	F	1
584088623	489195848	344935459	F	1
584218791	307706066	375585872	F	1
584735517	108377686	396385191	F	1
584736115	299762810	181344315	F	1
585261072	465370124	248678715	F	1
585270503	.	397727417	F	1
585533877	.	438891027	F	1
585538548	108379189	560215674	F	1
585544399	108379134	273017646	F	1
585851672	427140973	353657207	F	1
585851762	273151123	440341556	F	1
587558939	.	558649736	F	1
588136784	.	588135936	F	1
588238948	273082055	588136636	F	1
588738491	334747737	548744504	F	1
588743280	108380798	448022410	F	1
589219075	451915188	350019532	F	1
589439764	459105695	386669884	F	1
590597791	352581240	327391572	F	1
590977008	363341631	302605998	F	1
590977193	345915308	361333625	F	1
591832768	344885034	435832771	F	1
592024905	108379189	502656486	F	1
592215577	.	184278985	F	1
592286400	.	774472731	F	1
592846575	108379011	412375837	F	1
592846822	273083369	557637236	F	1
592850947	108380781	566452174	F	1
593066602	174799712	548329399	F	1
593754202	191995909	174967411	F	1
593754531	108379302	530161813	F	1
593757717	410602740	502287533	F	1
594594396	352646675	401321439	F	1
595338746	572924688	579433613	F	1
595728803	424487649	444266735	F	1
597306211	108379457	361580645	F	1
599325272	.	599325444	F	1
599353071	462465664	439675144	F	1
599739928	69092092	578243366	F	1
599740280	254857378	192101885	F	1
601181477	115804804	546906182	F	1		0
601323449	490106902	390330025	F	1
602520712	488072812	186018028	F	1
602709368	.	472436702	F	1
604588495	273163870	576062212	F	1
605628339	72299934	490080118	F	1
605629860	385171065	397152204	F	1
606437970	184306464	497971128	F	1
606440168	352871687	502189151	F	1
607151330	.	549173438	F	1
607352714	577259695	552365813	F	1
607517889	69091981	274894148	F	1
607820423	391338303	545199392	F	1
608310953	.	70895953	F	1
608661091	115804848	587744990	F	1
609284822	405165633	554582910	F	1
610998746	108373262	353805825	F	1
611580060	108380781	681859425	F	1
612754664	440244976	539747471	F	1
613257406	348485411	440899750	F	1		0
613712064	108376347	187915653	F	1
613932400	372831455	497975119	F	1
615876606	563045691	575006566	F	1
616961734	421318388	427853486	F	1
621148410	359352002	248673198	F	1
621150837	379676721	248634096	F	1
621496540	.	489239619	F	1
622121211	359352002	420200412	F	1
622121214	142912364	432184047	F	1	7
622380798	353203192	265134444	F	1
626133984	474977103	224400036	F	1
626135874	435941733	460192069	F	1		0
649995000	108376528	438457532	F	1
649995695	575529743	575529487	F	1
649996516	108379320	186620398	F	1
662526683	361215133	416391435	F	1
662631128	438232050	546147623	F	1
663294996	384981453	487978567	F	1
663296354	387278322	450410568	F	1
663296839	457798824	544423982	F	1
665266386	108376528	181277859	F	1
665266678	546904786	467983301	F	1
666138372	166163512	186586672	F	1
666249510	78325603	350065806	F	1
668388046	451924511	440746830	F	1
668388871	474905786	503162976	F	1
668670110	.	400754184	F	1
669051661	108379238	450583627	F	1
669223429	377191239	552351271	F	1
669229758	545542622	545542617	F	1
669231094	448322317	547870756	F	1
670012984	164111878	428411363	F	1
670034360	.	147225139	F	1
670218818	371271654	416337238	F	1
670230114	389195926	459094474	F	1
670231389	108376448	433502999	F	1
670231705	274919140	402391494	F	1
670579868	251970870	500541530	F	1
670580440	184131913	124096919	F	1
670586062	187885711	190836396	F	1
671026691	.	400496883	F	1
671285965	489205559	272904926	F	1
671288433	459426562	575430843	F	1
671616258	454753336	555546197	F	1
671616788	495530623	396387345	F	1
671778301	474905786	508803077	F	1
671838044	480556007	450873205	F	1
672181838	108379134	459122395	F	1
672184370	409345690	447508538	F	1
672395029	.	464202743	F	1
673381775	369406494	437701975	F	1
673382766	589167762	397722629	F	1
674433903	.	396166716	F	1
674910161	181275735	181275628	F	1
674913378	190776507	531675258	F	1
675160571	423006780	558375764	F	1
676339982	.	404008673	F	1
676456136	453106940	391423150	F	1
676461065	550207754	462565401	F	1
676464157	412575941	411818691	F	1
676469504	412575941	472196674	F	1
676701810	.	72970110	F	1
677164359	390902725	546896154	F	1
677360505	.	544892010	F	1
677374591	352375231	151959686	F	1
677977297	181363044	183619861	F	1
677977717	546425955	546425960	F	1
677984907	69091138	396686222	F	1
678211458	508088442	145645111	F	1
678213784	.	544086470	F	1
678416848	352628151	181277377	F	1
678422721	523041782	454492794	F	1
678424069	421171805	439675717	F	1
678509915	108380781	408786112	F	1
678510183	491065906	423118858	F	1
678510189	450512851	402814005	F	1
678510864	287452815	473310473	F	1
678511774	108376528	546151615	F	1		0
678522296	348193796	479800523	F	1
678765796	108376528	529201845	F	1
678766035	.	485409355	F	1
678772691	424784397	544110066	F	1
678779356	.	464774777	F	1
679095878	491854901	407360677	F	1
679096836	491854901	354146700	F	1
679098783	108374518	456508187	F	1
679634033	.	348396889	F	1
679636601	398179977	438376363	F	1
680646025	419257562	439662170	F	1
680647527	.	393605150	F	1
680660752	410612170	363640512	F	1
681714420	390894597	545216568	F	1
681724333	407731278	552836919	F	1
682505287	186606253	545861532	F	1
682879017	108379252	554138281	F	1
682935805	.	773399538	F	1
682967741	287451206	552835602	F	1
682971050	.	514347194	F	1
682973373	377818313	301862414	F	1
682976682	300496696	184236155	F	1
683479208	.	499503393	F	1
683479597	108376528	360714009	F	1
684229270	548312450	548312454	F	1
684501581	.	353766784	F	1
684695989	438458247	475732894	F	1
684969409	378654987	76551926	F	1
685199379	449336505	451022650	F	1
685448623	530731742	542276349	F	1
685452087	486097509	398164147	F	1
685455375	450512851	186541702	F	1
685828978	548295642	548295644	F	1
686023490	544892836	544892774	F	1
686355793	186499203	186499037	F	1
686356739	443894991	449584257	F	1
687532402	440283548	557042725	F	1
688136347	184300808	434618861	F	1
688136584	272887679	251859416	F	1
688140077	169889891	438376355	F	1
688142635	275031072	551104719	F	1
688415652	426123640	387361682	F	1
688420787	348385304	463454082	F	1
688721083	458099053	347529829	F	1
688722774	139799117	451331351	F	1
688723054	.	744215094	F	1
688929171	108376528	352106352	F	1
688933157	108381473	411209100	F	1
689034737	415238965	518027401	F	1
689037127	108373084	504339804	F	1
689039135	577094715	576435577	F	1
689040837	452829080	555557988	F	1
689299893	486100045	410596786	F	1
689681334	.	568216885	F	1
690127684	352100532	570326540	F	1
690946643	553309814	553309307	F	1
691513269	238413877	550197183	F	1
691517252	.	359210158	F	1
691520271	273056755	569765149	F	1
691520454	356970857	452379892	F	1
692407487	385750294	365309798	F	1
692615490	.	566993186	F	1
692616742	390903972	544419184	F	1
692814098	548312450	520436578	F	1
693725832	552817443	552817425	F	1
694205047	391193058	553310056	F	1
694418981	275031072	551087650	F	1
694424102	.	507037557	F	1
694673302	439955000	485574511	F	1
695247353	.	435327397	F	1
695620195	.	578823469	F	1
696465033	495341434	248617956	F	1
696466256	539244721	539244673	F	1
697356201	269533845	354606812	F	1
697356202	269533845	354606845	F	1
698926660	274916060	564352878	F	1
699349123	516365682	397435885	F	1
699354603	.	436769321	F	1
699398544	.	439663347	F	1
699565364	451653215	466468653	F	1
699729439	463169407	552809159	F	1
699731691	108373262	560253971	F	1
699968244	181338299	117479807	F	1
699971989	186500975	120074335	F	1
700283001	.	553793743	F	1
700284816	345303521	441216655	F	1
700494725	108376528	403782558	F	1
700498252	354884395	464775158	F	1
700861084	456751632	529527952	F	1
701028856	.	439386418	F	1
701350732	.	545217479	F	1
701862076	451910199	577720323	F	1
704182210	461824869	440018522	F	1
704184616	410585007	441012882	F	1
706012879	190802759	274773183	F	1
706013821	381739553	375067436	F	1
706238134	313309389	530161884	F	1
706382341	505979829	272899543	F	1
706572544	108379252	508273829	F	1
706573807	278348521	186690583	F	1
706757134	352581240	327391545	F	1
707058637	352589639	545199599	F	1
707581657	540362057	184271185	F	1
707885727	537793832	464680646	F	1		0
708060807	300496696	184236137	F	1
708375881	273073487	545864346	F	1		1
708376673	364674970	544901711	F	1
710262109	460415353	551692454	F	1
710262611	174799712	551704857	F	1
710769798	108379238	461902017	F	1
711232713	.	498722503	F	1
711233419	.	403060305	F	1		0
713735798	.	563053664	F	1
714070304	418505262	349217104	F	1
715099836	575006093	575004286	F	1
715101072	428014937	547868471	F	1
716989585	283560750	550189793	F	1
717417865	456066539	551741079	F	1
719569725	186547025	548788549	F	1
719570617	395911577	519838357	F	1
720314354	116542523	551686910	F	1
720315268	461559159	482881510	F	1		0
721123699	169889891	508273099	F	1		0
723084715	.	774470905	F	1
723273005	482127182	476029295	F	1
723511876	108379457	397731974	F	1
724991785	472922687	375415494	F	1
724992399	467249023	558631558	F	1
726511985	270107632	389820615	F	1
726704345	440109541	552822458	F	1
729509049	519727643	442803536	F	1
729509985	346583457	357398181	F	1
730363752	448624100	417237581	F	1	6
730634192	.	772922628	F	1
730836690	430799368	446937290	F	1
731205096	300409500	442397827	F	1		0
733692524	186499698	431498719	F	1
733913411	.	688723820	F	1
734404159	108373194	515538460	F	1
734406787	431999055	551467640	F	1
734479920	108379272	545867640	F	1
735992911	436569829	551096256	F	1
736313461	509939787	368595306	F	1
737026985	108379320	546867911	F	1
739180860	401332088	546136389	F	1
739877928	108379252	550216923	F	1
739926549	.	555560386	F	1
740404546	.	583035512	F	1
740503715	438313338	438185110	F	1
740792960	454740238	546936509	F	1
740793635	.	551455909	F	1
740796068	466873063	516740806	F	1		1
742586236	395593884	571620509	F	1
742587842	350261958	420219272	F	1
742829632	108380699	181392442	F	1
743342705	396158447	551087092	F	1
744098048	399743723	564352560	F	1
744098137	520314650	564134284	F	1
744297519	108379134	536707597	F	1		0
744298785	491708968	497884762	F	1
744298790	108376463	546935919	F	1
744463957	108379302	517255974	F	1
744814096	359203322	547776828	F	1
745327030	443375588	343990209	F	1
745665795	.	505483406	F	1
745666195	344933786	551076478	F	1
745948179	307706089	409363260	F	1
745951012	186727950	440452389	F	1
747298564	439022746	451657254	F	1
747916259	450328611	552284359	F	1
747916618	385751154	468523804	F	1
748200242	398179977	552832367	F	1
748648650	108379302	547840066	F	1
748965669	108374717	565621108	F	1
748982016	287450885	380833575	F	1
749237373	467973864	449434153	F	1		0
749244857	358441543	450586153	F	1
749915186	532286077	551704403	F	1
749915825	.	497666535	F	1
749915845	532286077	551704425	F	1
749923807	273052486	545202719	F	1
749926770	558616864	558616875	F	1
750252425	307709026	506421938	F	1
750811428	108374518	437455519	F	1
751119827	108376528	516366756	F	1
751187043	.	467660816	F	1
752071538	.	443420037	F	1
752752651	354534554	548312443	F	1
752759225	493708777	480764299	F	1
753274027	443287811	549165520	F	1
753278317	560749218	560747872	F	1
753280971	492422958	443436524	F	1
753281038	521215375	507306415	F	1
753953878	376708484	405326792	F	1
753962461	241209475	555298513	F	1
754506727	148470003	541791435	F	1
754755563	.	571510120	F	1
754762327	492257272	492257247	F	1
757287886	108376540	274891292	F	1
757292707	492274499	480151337	F	1
757300432	466656246	548782334	F	1
757529955	434504053	420140289	F	1
757531371	108376281	546151193	F	1
758056151	580406999	395657926	F	1
758067940	546897326	437982795	F	1
758067988	514148126	558616326	F	1
758073136	482838505	403788249	F	1
758075878	426898472	554128309	F	1
758389420	419258419	192073461	F	1
758395753	108379320	551690937	F	1
758397718	616636568	551703024	F	1
758408176	.	570775380	F	1
758408180	.	547863034	F	1
758410829	489614520	554596294	F	1
758884087	398069843	385248563	F	1
758885509	.	574552053	F	1
758889146	108380989	550179743	F	1
758889191	524309950	514148169	F	1
758889899	466864215	176889419	F	1
758891676	.	545539748	F	1
759189754	274894060	460884718	F	1		0
759198309	418080591	354706598	F	1
759473962	356976960	346293937	F	1
759843651	395911577	394205077	F	1
759844624	.	426826763	F	1
759845016	195088519	547857112	F	1
759850360	424781758	346026685	F	1
760123522	399841872	553805973	F	1
760134140	186747587	504779985	F	1
760135406	587381826	248703536	F	1
760142280	186509574	569779107	F	1
760750310	414151095	562246556	F	1	7
760752655	390952999	546449220	F	1
760763367	665266473	543840127	F	1
760893646	511897524	508274667	F	1
760895187	583261570	386922223	F	1		0
760902047	.	568099346	F	1
761327816	581493334	385095075	F	1
761922087	108379252	568643755	F	1
761923710	288900901	544414085	F	1
761925743	108381091	363090868	F	1
761937406	377416198	550231062	F	1
761938220	424781758	346026682	F	1
763805100	416380211	547861287	F	1
763805407	566245543	546454386	F	1
764091613	516700928	551448975	F	1
764094128	540333444	551083284	F	1
764709707	409046335	420929533	F	1
764710308	.	568208776	F	1
764712347	.	327413325	F	1
764712797	574543417	274896280	F	1
764713623	108379302	550187787	F	1
764713945	108379320	557646613	F	1
764714002	108378092	309422025	F	1
764717128	457798824	70866775	F	1
764717155	187161214	551101546	F	1
764883018	509981793	505385149	F	1
764885392	327419753	397589562	F	1
764900075	334819414	550160327	F	1
765198524	69092068	573540516	F	1
765199125	428550028	405328589	F	1
765536534	.	251870340	F	1
765780759	459920419	688572107	F	1
765784372	485571716	550148037	F	1
766146018	118855810	432511841	F	1
766146594	273070435	547840798	F	1
766148778	108373194	557503747	F	1
766581586	108900412	574991401	F	1
766582610	108379252	391422508	F	1
766875680	549086594	548784891	F	1
766876030	.	548305346	F	1
766880070	581239441	414610722	F	1
766880775	.	435687349	F	1
767209886	274910652	562093993	F	1
767347480	108374247	767347391	F	1
769838823	279728025	550186551	F	1
769842561	346030245	346030272	F	1
770388336	464691973	492276165	F	1
770407073	355002289	592022422	F	1
771806855	390955650	427215479	F	1
771871255	425309655	772934528	F	1
772159585	496400199	184105432	F	1
772167380	410584882	554605168	F	1
772453627	495726167	574989976	F	1
772916833	441403727	150061638	F	1
772932135	.	548757531	F	1
772932237	482838448	559152365	F	1
773382426	404011235	551725831	F	1
773393129	388240518	552814687	F	1
774489722	402526077	463456211	F	1
774493680	497205835	406353385	F	1
775086840	391647932	576608871	F	1
775090401	397723846	455078310	F	1
775106790	273050886	533283421	F	1
775401972	425172055	557048400	F	1
775404882	.	392782304	F	1
777310438	527067495	355379202	F	1
777317119	564852412	300407357	F	1
777323059	306873557	508503754	F	1
777382150	.	777732224	F	1
777732562	.	548792648	F	1
777784842	.	492286277	F	1		0
779908524	411994983	399613299	F	1
780809964	309237172	464512500	F	1
780813999	.	554572543	F	1
780815732	.	554572576	F	1
781216830	270107632	501899518	F	1
781222564	.	566944623	F	1
782208884	430614622	248598714	F	1
782213014	514836575	560252735	F	1
782214086	584425709	548308100	F	1
782216347	108373194	566435213	F	1
782503345	381109320	347951220	F	1
782504528	560114199	355441554	F	1		0
782505335	273050886	554593757	F	1
783035690	435583947	565638890	F	1
783037938	476605335	568226143	F	1
783040295	534079822	578290748	F	1		0
783638663	584216753	547848656	F	1
783987679	544551504	78432664	F	1
784812347	424487649	444266703	F	1
784813951	.	442825556	F	1
786039269	443360452	558628201	F	1
786039270	443360452	558627164	F	1
786283562	540245544	546137348	F	1
786286047	78034858	364990005	F	1		0
786766656	397325916	77168972	F	1
787004935	509955455	560226461	F	1
787005463	272923799	430011566	F	1
787214526	143791531	551682588	F	1
787215588	.	117977309	F	1
787217480	408355538	552819391	F	1
787948244	108379252	539169636	F	1
787951067	273081083	555294360	F	1
788452251	.	546438214	F	1
788454767	108375147	548778677	F	1
788454897	438230787	72647310	F	1
788886259	458706118	547845614	F	1
789171932	367429109	560794520	F	1
789391390	496400199	513771012	F	1
792034802	.	441987493	F	1
793229066	.	793228833	F	1
793229215	.	543539702	F	1
794650583	.	534733625	F	1
795049539	386628815	363853393	F	1
795316042	385752620	145685748	F	1
796416002	514771896	555047866	F	1	6
796416025	.	584209504	F	1
796416896	604185262	507032347	F	1
797126150	458464531	405931122	F	1
797967124	275017174	440342366	F	1
797967834	108380925	592211951	F	1
799100585	534241811	442505622	F	1
800049503	.	579426795	F	1
800115033	108379302	576626047	F	1
800280949	466162387	551665110	F	1
800891415	410612170	437599602	F	1
803250970	377191239	552355342	F	1
803253300	108375989	275035118	F	1
804452151	108375989	186700551	F	1
804897655	505978877	553800801	F	1		0
804898096	.	529624349	F	1
805937790	187869661	553308529	F	1
807979331	571516972	181361389	F	1
807980766	108379252	579886565	F	1
808904184	108374763	487229250	F	1
812856527	443870961	585265548	F	1		0
815133179	478414901	512467740	F	1		0
815812707	537793832	562093448	F	1		0
815813135	482838445	552821057	F	1		0
816508955	.	551719487	F	1
816870741	354887007	566953221	F	1		0
817070729	246750388	352885477	F	1
817267388	378374802	608150328	F	1	7
819840621	492806389	396394234	F	1
822324802	.	772925603	F	1
823866180	108379320	719822599	F	1
824682924	593729786	316175945	F	1
825055221	.	537285081	F	1
826196562	396766905	279682103	F	1
826196871	395623565	548318208	F	1
826197185	108373550	380545652	F	1
826206808	.	494622721	F	1
826435395	391777273	576533838	F	1
826711417	515893625	147664665	F	1
826711990	405178297	585061070	F	1		0
826714437	.	504776278	F	1
827963189	391777273	542186912	F	1
828381497	273072011	528647943	F	1
828381578	542662660	589830100	F	1
831149880	.	77224555	F	1
842947991	580128786	581228356	F	1		0
843159601	190822027	248646738	F	1
843159747	273050886	588228592	F	1		0
843429442	433326042	539333201	F	1
843816953	108376485	424664987	F	1	6
844381194	564803766	513453816	F	1
846938893	108376295	545539225	F	1
846948329	108379252	774472752	F	1
847319152	.	82680474	F	1
847577199	139799117	503179421	F	1
847980612	581228027	450407652	F	1
850205770	520314650	440772051	F	1
850206078	469289008	450589712	F	1
850991911	.	83012445	F	1
852207579	.	773395633	F	1
852238682	620662003	533825043	F	1
852442306	669222853	548312435	F	1
853052780	665268507	560107551	F	1
853469636	542662660	463717256	F	1		0
853469638	493216513	269531182	F	1
854388491	108375945	544898933	F	1
855658477	496657856	613070264	F	1
855658762	.	509662384	F	1
855920023	482838445	585062381	F	1		0
855920198	434393775	551716143	F	1
855922443	481965671	501761886	F	1
856643005	501787960	108403922	F	1
856646692	273165663	590324089	F	1		0
856810119	.	551455912	F	1
857469156	587367233	378288023	F	1
857472302	582005491	545558942	F	1
857994180	387284019	858169119	F	1
858169338	108380925	539170875	F	1
858372949	358441543	495087244	F	1
858798247	.	566231990	F	1
858800459	586064791	117521682	F	1
859206460	555836859	441664748	F	1
859481671	541992785	384156023	F	1
859907333	701184077	553313953	F	1
860627079	534482302	443873863	F	1
860630408	.	124456706	F	1
860630479	472495646	387358350	F	1
860632011	361326447	546875681	F	1
860911807	210143657	424270088	F	1
861446747	393048350	581230726	F	1
861453457	116542523	186605416	F	1		0
861654621	575340672	555299914	F	1
861657234	663296131	668858472	F	1
862140544	588924072	514051906	F	1
862149527	462887577	545205412	F	1
862742804	491628804	512061851	F	1
863498378	406608047	502284011	F	1
863959877	519377828	612104294	F	1
863965251	.	488074909	F	1
863970392	607352890	472788613	F	1
864323256	473037978	565621924	F	1
864917592	388018987	403044483	F	1
865235164	273050886	394723736	F	1
865547816	159198615	666908942	F	1
865817634	498692852	407419275	F	1
865825827	108379320	184296983	F	1
865894460	.	394716669	F	1
866068281	462467852	365858747	F	1		0
866073827	438375543	545207756	F	1
866307287	568748231	583041918	F	1
866317726	274977458	546876558	F	1
866595378	415987749	545860600	F	1
866889767	108380925	442897436	F	1
867768191	355002289	500271728	F	1
867782046	482838448	547831382	F	1
867786057	.	445958800	F	1
867789228	513166036	668671852	F	1
868156934	577196379	545531772	F	1
868456567	548287508	548287510	F	1
868459089	.	590094330	F	1
868460360	480956907	452526500	F	1
868793922	457906632	393608967	F	1
869038149	401335959	548293218	F	1
869038150	401335959	548293213	F	1
869044712	671289308	553799438	F	1
869046503	288917281	261499081	F	1
869399028	552363341	552378520	F	1
869408488	.	671277073	F	1
869413528	499898416	588438546	F	1
869803914	.	355030785	F	1
870043893	542187694	595124975	F	1
870044565	184230511	568207930	F	1
870048805	278488825	554584970	F	1
870054486	.	544633607	F	1
870515668	.	573991600	F	1
870517240	500789842	560119342	F	1
870521376	420384844	509245931	F	1
870522270	434220494	548767219	F	1
871298984	377659979	186588946	F	1
871307302	.	441222091	F	1
871308685	507482501	185964725	F	1
871311175	622656281	552377038	F	1
872042157	454753336	388906377	F	1		0
872098552	671838563	672186912	F	1
872102045	108376528	491474767	F	1		0
872104639	458394284	123947317	F	1
872107836	541202750	436181028	F	1
872109272	508453117	403256776	F	1
872244469	.	407201050	F	1		0
872315469	.	503739726	F	1
872599591	.	552849054	F	1
872603948	186582912	550183140	F	1
872609241	558106497	670585742	F	1
872611140	541202806	558099135	F	1
872616054	573995635	676452054	F	1
873361835	482838445	497321094	F	1
873364599	479621639	383938378	F	1
873688371	108373399	570211898	F	1
873690965	.	773395693	F	1
873701776	539170850	600703047	F	1
873708018	555445796	430764691	F	1
873800938	.	587744118	F	1
874036812	108381250	587740177	F	1		0
874373687	108375989	583873527	F	1
874383308	354803706	343535985	F	1
874748130	433300353	587244944	F	1
874768234	439953132	550206612	F	1
875585088	497534214	509479960	F	1
875585170	388689487	159148294	F	1
875587514	159198615	394391802	F	1
875606148	568095053	538842954	F	1
876546043	108376528	580957702	F	1
876839568	665642094	544411823	F	1
876843099	415987017	548762753	F	1
877181783	616637769	588442432	F	1
877183723	483758829	354505923	F	1
877184495	273079835	556712289	F	1
877950142	458667570	615875128	F	1		0
877951842	678511660	543539597	F	1
877971728	626132609	553302768	F	1
878569808	108376528	187904342	F	1
878576811	.	611877112	F	1
878577444	559150200	559149961	F	1
878647265	108372864	774487333	F	1
878912463	607351090	685202348	F	1		0
878917374	484265935	547827518	F	1
878918805	508053649	403783593	F	1
879229984	489057638	582569555	F	1		0
879236629	358441543	391423247	F	1
879584516	550202404	546420725	F	1
879592985	490861523	190862709	F	1
879594814	665642948	425592700	F	1
879595085	373694921	425592716	F	1
879595199	.	440108892	F	1
879596376	465793181	400126390	F	1
879597053	396510203	582570583	F	1
879598133	443340351	527851066	F	1
879598445	412001219	578242706	F	1
880262670	.	674435237	F	1
880267486	614517754	504061375	F	1
880270256	559150200	144373814	F	1
880273908	489283466	538870921	F	1
880282667	591831709	192103742	F	1
880686941	.	405537628	F	1
882301664	592429104	552811061	F	1
882307233	186621673	397437640	F	1
882309712	354542284	458759743	F	1
882311636	.	550147719	F	1
882312568	613256161	485123790	F	1
882313670	526179215	585050993	F	1
882313781	108373318	562855020	F	1
882317365	614148978	457852299	F	1
882319863	.	386669872	F	1		0
882786826	482838448	548758679	F	1
882788627	622656177	545858151	F	1
882791603	535678943	606439858	F	1		0
882795257	181273059	548735344	F	1
883281017	108379252	325650161	F	1
883286714	554572988	554572974	F	1
883662597	671285962	394406860	F	1
883669946	108379216	544413341	F	1
883674097	671774700	548290783	F	1
883676678	.	669057890	F	1
884533707	464691973	492276165	F	1
885978145	.	577252240	F	1
885990940	108379231	556343186	F	1
886001082	.	810533067	F	1
886001723	532925800	441792502	F	1
886002465	584216209	469718706	F	1
886003204	418581697	425095743	F	1
886827703	549570547	576535720	F	1
886829310	558104350	590395741	F	1
886831517	462684894	505990247	F	1
886840307	.	435830287	F	1
887694361	584742473	569633490	F	1	7	0
887694462	326632374	589832443	F	1
887695290	120822740	458908821	F	1
887708521	497547232	546454992	F	1
887709313	142902799	546945687	F	1
888439427	108379320	551716133	F	1
888447109	.	670442030	F	1
888992052	506007634	562845001	F	1
888993577	.	547775581	F	1
888993791	646116506	464460077	F	1
889376240	542187691	401782937	F	1
889376799	582005491	677366913	F	1		0
889378042	381111214	498708727	F	1
890671222	535677978	563616358	F	1	7
890671227	535677978	496920667	F	1	7
890673733	358441543	450151415	F	1
890675734	614332122	555548368	F	1
891322235	454753336	545869849	F	1
891331577	395536163	613254754	F	1	4
891933560	504315182	683466725	F	1
891936880	389511379	578825014	F	1
891944010	534482302	334780466	F	1
891947853	514796697	460888788	F	1
892732403	555445569	548306924	F	1
892734936	584742473	563605429	F	1	7
892736033	.	555290309	F	1
892737043	402434435	497486448	F	1
892738853	534482302	549163949	F	1
892740548	519377828	186547830	F	1
892744387	519201492	450590084	F	1
893115636	273050886	531595556	F	1
893116888	575340672	555291721	F	1
893519132	564803766	495691648	F	1
893974985	398870284	447949337	F	1
893977964	108376331	554136913	F	1
894705737	108379216	895050187	F	1
894707800	108376485	186663785	F	1	6
895046883	603249176	551090872	F	1
895050361	.	121823264	F	1
895330502	.	671782748	F	1
895580193	.	675280851	F	1
895584311	540640331	348535375	F	1		0
895586499	273082709	593065943	F	1
895868704	108376528	526972367	F	1
896448672	429536351	511509373	F	1
896450176	536376726	551085927	F	1
896802938	466665078	605627381	F	1
896807258	483114717	360072857	F	1
896808854	.	442393707	F	1
897149098	108379320	549169245	F	1
897412732	282670375	349201436	F	1
897412830	282670375	621986550	F	1		0
897413829	500287739	505702455	F	1
898346189	186681644	555287760	F	1
899246743	371277093	407951402	F	1
899248938	604779566	456658252	F	1
899606191	583262245	186485205	F	1
899613197	108378672	566992712	F	1
899915666	356357221	552832798	F	1
900233338	554756486	551074102	F	1
900479830	108379320	525737645	F	1
901362969	108373262	695248002	F	1		0
901367111	897144608	562394226	F	1
901676019	355002289	436838267	F	1
902821079	356337996	574993123	F	1
903708930	355002289	771806976	F	1		0
904566229	535478839	465167075	F	1
905253770	108379289	679095367	F	1		0
905254850	.	893975147	F	1
905257015	438706929	439959192	F	1		0
905260537	398179977	461902873	F	1
905513541	185961155	562085675	F	1
905513565	490427192	402285315	F	1
906602957	735593647	448948009	F	1		0
906604013	348915183	582564242	F	1
907093599	411054943	345418100	F	1
907307969	568634120	466872309	F	1
907311180	108379252	603662621	F	1
907548093	478895229	412793695	F	1
907772072	549163958	549149389	F	1
909006132	489057638	909232450	F	1		0
909234969	448948025	388012293	F	1
910171761	613257392	186541872	F	1
910775039	576546013	524376473	F	1
910952151	419640292	412003829	F	1
911315739	519100278	695536421	F	1
911594214	316163642	560225658	F	1
911594216	509955455	562369034	F	1
911595419	460415353	551692473	F	1
912306544	482838445	686512236	F	1
912308079	.	551709933	F	1
912309026	394209803	184251652	F	1
913040016	510687669	492340415	F	1
913962164	543387396	544551820	F	1
913962165	543387396	582270797	F	1
913963667	554756487	397726179	F	1
914434595	688724021	531596141	F	1
915547610	550216375	550141615	F	1
915549013	571516972	441783764	F	1
915551690	544016842	541629243	F	1	7
915824552	494551362	562368931	F	1
918262942	707580243	413859357	F	1		0
918589260	.	727201727	F	1
918590578	482838445	670435795	F	1
919583459	454753336	537285000	F	1
920365168	.	711017957	F	1		0
920598762	108376313	606441163	F	1
920821958	536562893	553789364	F	1
922339483	108379231	409407928	F	1
922612067	.	735697616	F	1
922612569	431970408	437255923	F	1
922900916	481430471	481430355	F	1
923452791	192090845	554144835	F	1
923792953	108373194	560642806	F	1
923793377	258442198	544424772	F	1
923793617	581739458	608871660	F	1
924084630	489899826	551713295	F	1
924085307	535478845	345984622	F	1
924728274	108379231	668601188	F	1
924729231	621339489	536027857	F	1
925304232	526892227	539641060	F	1
928322193	.	499381590	F	1
929078357	489202703	573526248	F	1
929374907	415988089	596669756	F	1
931180674	.	873547751	F	1
931488645	594535737	591828809	F	1		0
932458493	571516972	298920488	F	1
932736325	669826102	673387253	F	1	7
932738761	433303049	575529447	F	1
933819704	708222745	483959702	F	1
933822850	482838448	486944478	F	1
934068946	108375564	663296635	F	1
934069918	108376528	612103410	F	1
934070708	482838448	545869737	F	1
934784798	482838451	566958743	F	1
935873853	108380781	667938810	F	1
935905031	.	452682282	F	1
936133123	519393783	519784325	F	1
936315223	458438037	181334452	F	1
936315302	108380674	357653334	F	1
936870254	616280333	573997127	F	1
937682849	533154341	539243804	F	1
937690144	.	937872181	F	1
937872542	482838445	454361631	F	1
938791919	623020282	439623616	F	1
939148921	454753336	690939406	F	1
939153250	372036398	395766573	F	1
939727111	544374475	287452753	F	1
939729282	523049106	544422228	F	1
940388372	538322255	617413097	F	1
940388937	602361008	695536015	F	1
940555957	666020522	270249370	F	1
940698557	577605900	674915504	F	1
940835726	108376528	612753338	F	1
941297952	537793832	606964434	F	1		0
941484086	543388178	501443103	F	1
941595075	69092092	453182114	F	1
941610804	562387440	775393340	F	1	7
942310778	482838445	758142047	F	1		0
942311219	481358576	672808095	F	1
942314892	721767550	677367238	F	1		0
942808708	542663036	678416791	F	1
942810061	384981453	487977819	F	1
943085688	.	773080900	F	1
943086246	678777711	185964971	F	1
943601450	.	546362311	F	1		0
943601996	71244622	539012422	F	1
943605562	454753336	666495063	F	1		0
943999333	534482302	512186099	F	1
944000627	482838445	685456159	F	1		0
944001318	.	713735375	F	1
944162562	760746756	548310478	F	1
944165317	607515574	449260574	F	1		0
944342746	108379302	506333126	F	1		0
944664450	713225591	353870049	F	1
944854194	.	376963594	F	1
944854822	399542995	344909819	F	1
944857040	553812333	553812329	F	1
945020503	686362281	551004646	F	1		0
945828720	507314257	546419185	F	1
946045361	.	528018090	F	1
946047199	405674516	671284279	F	1
946097289	.	575558827	F	1
946260238	614148978	274922492	F	1		0
946501551	391776854	671849326	F	1
946888469	542353508	744098136	F	1
946889905	398179977	396396441	F	1
946896632	723271955	546135690	F	1
946897748	108377148	441781716	F	1
946904292	676710695	124155995	F	1	7
947778900	.	579433568	F	1
947779017	628520673	435466982	F	1
948242417	.	448698908	F	1
948674646	345942153	396520394	F	1
948682824	726513890	459118733	F	1
948685877	743947090	666249510	F	1		1
948687619	511761843	670027977	F	1		0
948980611	524650785	471416496	F	1
949316150	536707786	541026628	F	1
949318819	540521080	553198464	F	1
949463416	108376528	773391027	F	1
949605426	749048733	568098454	F	1
949887731	381741775	732993194	F	1
949894495	489208811	546953572	F	1
949896145	604779566	465171693	F	1
950252786	354803706	455173678	F	1
950255125	748188624	511074762	F	1
950262086	571505389	597306985	F	1
950743184	489760061	427858035	F	1
951462884	610568400	580955271	F	1
951472544	499599073	496019845	F	1
951473891	602250546	355376686	F	1
951475231	536376726	551085919	F	1
951782208	796978851	502897656	F	1
951788365	392781922	399976649	F	1
951791760	273145774	436014299	F	1
951797522	.	752068504	F	1
951804077	614148978	190835795	F	1
952339434	602249961	698069232	F	1
952340085	609284730	744459228	F	1
952342193	.	184281533	F	1
952343062	372406892	570327180	F	1
952346727	752759146	966946639	F	1	7
952703191	674922506	765487801	F	1
953050695	805207996	184200663	F	1	7	0
953376714	480740542	563604059	F	1
953695910	695619530	672402319	F	1
953702360	745156324	370108769	F	1
954194846	568096118	447508538	F	1
954195838	395585129	298920785	F	1
954199236	744464441	555541218	F	1
954204037	483758829	248627702	F	1
954213278	184055539	190745737	F	1
954574200	542663036	553630246	F	1
954579805	410854621	559163100	F	1
954588791	721124358	328409168	F	1
954951914	465793181	459323479	F	1
954963261	690943650	248632021	F	1
954963262	690943650	347515581	F	1
955332841	701351799	546148682	F	1
955336113	492431146	431961645	F	1
955676202	403272005	392875722	F	1
955681106	745114614	684959850	F	1
955681964	796978851	360566563	F	1
955685787	772923929	588742431	F	1
955687897	459904478	546153358	F	1
956045482	141685564	140006616	F	1
956126753	480556007	774485918	F	1
956585812	752069146	548312214	F	1
956588826	514796697	366371988	F	1
956958305	474726119	564856347	F	1
956958359	546362247	743345374	F	1		0
956963815	.	694206705	F	1
957330565	409268951	608308834	F	1
957334687	680643621	478102101	F	1
957336971	.	546135324	F	1
957337543	598379217	569755850	F	1
957338197	609286029	666760507	F	1		0
957342697	414151095	547852371	F	1	7
957343504	543284032	348503479	F	1
958525517	108379134	448475161	F	1
958526200	454753336	378945850	F	1
958530199	576089349	401650149	F	1
958537770	539003581	412381980	F	1
959197702	690943650	248632015	F	1
959197704	690943650	400152009	F	1
959199675	108379179	571931848	F	1
959209289	568095053	669046197	F	1
959623271	479974220	509661651	F	1
959628676	482838448	487043870	F	1
959637522	489899826	551709101	F	1
959641744	497372548	497372516	F	1
959642200	805373190	184119816	F	1	7
960013177	583041932	551712094	F	1
960021128	584210141	301982113	F	1	6
960025645	184090065	740791024	F	1
960025702	572172232	354620309	F	1
960416093	273050886	394571855	F	1
960425719	394339521	494240115	F	1
960433674	.	82811017	F	1
961049281	808197770	394804974	F	1
961049540	482838460	454751377	F	1
961050534	534561687	699731561	F	1
961056241	.	550172709	F	1
961066256	108381250	679098753	F	1		0
961069759	354902067	504337955	F	1
961432860	446020023	552351404	F	1
961794329	666493168	550070420	F	1
961794811	497205835	438563563	F	1
961796128	472033285	666249607	F	1
961802706	462874274	598064108	F	1
962182272	108376528	410144532	F	1
962627887	425540109	546893600	F	1
962643412	604779566	439102789	F	1
962645451	492035346	552368568	F	1
963254015	766593857	666137129	F	1
963257970	614873982	181353223	F	1
963705151	615876744	552832492	F	1
963708145	.	522152067	F	1
963710373	620647489	729197711	F	1
964146873	775083122	546892409	F	1
964149330	425172055	557048954	F	1		0
964151063	615068250	671770635	F	1
964152654	759845450	678766212	F	1		0
964152933	108380925	555549563	F	1
965012687	108379231	546431091	F	1
965025996	552728959	547834830	F	1
965035327	.	424409326	F	1
965040243	604779566	582277225	F	1		0
965690708	.	571517790	F	1
965772665	.	780603100	F	1
966356878	.	886838214	F	1
966362673	574543269	413695730	F	1
966365148	108380925	442897461	F	1
966368829	560229618	577609656	F	1		1
966779328	701351799	71438116	F	1
966779379	668858396	287450822	F	1
966780747	497205835	397438730	F	1
967230476	.	509518201	F	1
967244090	348078506	548778689	F	1
967845671	273079835	674429121	F	1
967847426	108377148	558500295	F	1
967848206	599576644	613506740	F	1
967852247	576536000	516809511	F	1
967858358	584425709	411425522	F	1		0
968402803	668121376	692813109	F	1
968406722	536563253	334714647	F	1
968406723	536563253	181344285	F	1
968410016	.	500291113	F	1
968412121	849600071	400986985	F	1
968414819	621339489	534974548	F	1
968417473	490427192	552828228	F	1
968817296	415987749	190840536	F	1		0
968830125	850333403	563612440	F	1	7
968830127	850333403	571500903	F	1	7
969314883	501111858	878911690	F	1
969656734	.	463963419	F	1
969666502	373196104	466162319	F	1
970242063	676710563	581395894	F	1
970252002	.	704183550	F	1		0
970264107	.	560241528	F	1
970265087	399743723	448679050	F	1
970277392	.	692605671	F	1
970841399	456098173	521412981	F	1
971253583	552283238	549179558	F	1
971258108	350196880	504568625	F	1
971258112	350196880	563054235	F	1
971258309	484693336	554759896	F	1
971261545	186553730	554144541	F	1
971262195	490432662	547862367	F	1
971588362	689037397	553306966	F	1
971588816	.	269537434	F	1
971592966	390952313	544552673	F	1		0
972350918	669661197	592887376	F	1
972355400	108373262	565618385	F	1
972360081	583861999	496719477	F	1
972363813	461518619	272885816	F	1
973166682	.	438558781	F	1
973167407	665268071	746717924	F	1
973177916	108377148	69558253	F	1
973180946	353893276	551725181	F	1
973614549	192082580	398522104	F	1
973620149	722560236	749606609	F	1
973966275	479465048	724991322	F	1
974431822	399279389	774472475	F	1
975087972	.	563064037	F	1
975097377	.	975485041	F	1		0
975098474	395536163	185965778	F	1	4
975493095	716646098	551067969	F	1
975497336	582556991	545556431	F	1
976169701	485941261	595370360	F	1
976174826	541202354	516371738	F	1
976177711	348383276	553301568	F	1
976178036	808222644	451460402	F	1
976393600	415987749	570349494	F	1
976399979	584209295	622259605	F	1
976401121	717140324	425534633	F	1
976404134	542662224	553741263	F	1
976404576	274917920	535112198	F	1
976807034	.	759468801	F	1
976807071	772160224	594597042	F	1		0
976812087	454753336	551080064	F	1
976814273	757292924	759189390	F	1
977378856	757298827	795049053	F	1	7	0
977381921	710263241	581489176	F	1
977386523	.	670872018	F	1
978242852	489210331	404015183	F	1
978244568	744979311	72325383	F	1
978246218	608147835	551077730	F	1
978588565	744297201	584740019	F	1
978588629	388689487	450589712	F	1
978595707	275016950	538870459	F	1
978597618	.	437305155	F	1
979155151	.	533958663	F	1
979554999	490428404	588228493	F	1
979561449	273084824	558628030	F	1		0
979562350	397565635	552828238	F	1
979940364	555285318	555285319	F	1		0
979940843	757294890	753026551	F	1
980266416	512457758	565622344	F	1
980266746	415987749	550154287	F	1
981020674	.	759474550	F	1
981020895	273026138	574442277	F	1
981027572	.	273117164	F	1
981680699	614148978	279687534	F	1
981986348	108376528	580959317	F	1
982483446	571516972	546943773	F	1
982489538	808197770	549169262	F	1
983091173	719401333	450162394	F	1
983097735	394390671	438815175	F	1
983467488	390903972	557672727	F	1
983471342	752069146	752752651	F	1		1
983471751	399279389	717419363	F	1		0
983789677	459867288	529203527	F	1
984203740	469290072	537363994	F	1
984206383	.	325449316	F	1
984998768	.	706384560	F	1
985002872	438706929	573555389	F	1
985562267	529523741	541353263	F	1
985875167	623020806	599412305	F	1
987279051	.	186490514	F	1
987279568	494223340	546942879	F	1
987688146	.	911592068	F	1
988443490	386517885	546894752	F	1
988729682	850333403	571500902	F	1	7
988729909	540520890	751285833	F	1
989553925	685140759	386516018	F	1
989810548	260318562	302762667	F	1
990019202	355447159	548731676	F	1
990021496	69091138	583048339	F	1		0
990582663	184260145	734459164	F	1
991128708	.	774502212	F	1
991383465	717419459	421838142	F	1
994098392	786035263	558262144	F	1
995511846	847954157	526078976	F	1
995789347	147066027	552734184	F	1	6
995790340	.	715254075	F	1
996264390	419638605	505067033	F	1
997595092	482838445	413918756	F	1
998495607	.	909234197	F	1
998500982	725880586	186541744	F	1
998500984	725880586	666650385	F	1
999772386	471837895	470718880	F	1
1000018866	482127182	771815904	F	1		0
1000448979	108379179	354884542	F	1
1000449303	731654511	603108170	F	1
1002660006	473037978	565621930	F	1
1003715329	740792244	565665259	F	1
1004931261	796978851	780568289	F	1		0
1006268431	539640747	184153688	F	1
1006592510	534482302	676924887	F	1
1006594717	438271961	513126822	F	1
1007352932	.	747920627	F	1
1007990491	380438583	452076171	F	1
1008299747	856620111	581482937	F	1
1008300124	390404758	754766629	F	1
1009054986	931423493	450443186	F	1	6
1009055747	139799126	680646431	F	1
1009677030	535111806	684695181	F	1		0
1010344086	.	708556330	F	1		0
1011678067	108379179	459574047	F	1
1011680917	720273678	726703930	F	1
1012055724	553329385	553327786	F	1
1012732913	735593647	810532434	F	1		0
1013078951	541301259	722818601	F	1
1013473841	466178255	554572557	F	1
1013881048	108376528	668605049	F	1		0
1013882250	398179977	443079861	F	1
1013884055	498703460	919057736	F	1		0
1014675083	1074804331	863901016	F	1
1015296811	514796697	608148019	F	1
1015754734	534481923	682977953	F	1
1015755350	734565466	764093106	F	1	7
1015756086	573985039	421368789	F	1
1016131308	482838460	526017323	F	1
1017146868	.	551687199	F	1
1018286384	395585129	576549363	F	1
1019717586	450494730	902530357	F	1
1020639077	506330962	797967483	F	1		0
1021715947	796978851	569619066	F	1
1022061106	479465048	267484271	F	1
1024330648	.	886838501	F	1
1024330652	.	886830394	F	1
1024555296	730838096	742045199	F	1
1024557076	572125764	187801945	F	1
1024557078	395536163	588228592	F	1	4	0
1024852713	399254996	544898209	F	1
1024853517	858494074	435575277	F	1
1024854033	604779566	817498258	F	1
1025681310	482838448	544633463	F	1
1025683109	108373262	688934412	F	1		0
1025877572	688415013	684230192	F	1		0
1026812361	108380989	721378187	F	1
1027115255	.	810532120	F	1		0
1027115879	108376347	539472263	F	1		0
1027116624	542988898	760137447	F	1
1027622166	742585537	185949154	F	1
1028305570	465604814	544102355	F	1
1028413167	.	148115328	F	1
1029508640	482838460	593259289	F	1
1029509788	758071730	622122341	F	1
1029925985	520314650	394424275	F	1
1030172614	743343383	256081119	F	1
1030582398	.	796417144	F	1
1030583213	.	701185531	F	1
1031501257	676927328	514020634	F	1
1031943050	775401144	553813820	F	1
1031945880	395585129	548747655	F	1
1031945973	69092092	613054701	F	1
1032313727	524868848	544079975	F	1
1032314437	190822027	785789325	F	1
1032521749	607352885	592846575	F	1		1
1033289365	700635323	192082583	F	1
1033470795	882143282	724284117	F	1
1034436903	554756486	757531248	F	1		0
1034436927	582560458	782508838	F	1
1034439560	537059933	547836638	F	1
1035157741	847954157	503307801	F	1
1035161085	.	552347298	F	1
1035161595	481974091	490745170	F	1
1035164057	426714933	552365507	F	1
1035598485	483507606	863982634	F	1
1035828137	381739553	576070016	F	1
1037857034	541202316	547850065	F	1
1038468494	878910172	665774471	F	1		0
1038471372	766151959	353225471	F	1
1038864422	807566273	566246642	F	1	5
1039521131	749622130	465156207	F	1
1039526679	.	866598006	F	1		0
1039528332	498200267	458421262	F	1
1039844633	386484379	847714873	F	1	7
1040430645	399241365	554143854	F	1
1040516698	242997578	448639222	F	1
1040519051	534639663	458439138	F	1
1040524558	368347814	406545880	F	1
1041317417	534482302	670428637	F	1
1041321986	722561824	753960836	F	1
1041590326	.	901674314	F	1
1041681659	873688908	560643066	F	1
1042476277	676710155	797127423	F	1		0
1043231624	856620165	577729909	F	1
1043258002	372406892	669468888	F	1
1045465631	856620165	767854606	F	1
1045893268	.	868802540	F	1
1046299387	532639337	581730586	F	1
1046304640	301862406	581230586	F	1
1046690790	436971632	548308290	F	1
1046693034	.	555941127	F	1
1046696349	765774640	453190015	F	1
1046700815	796978851	559699206	F	1
1046707870	607352885	685198919	F	1		0
1046714788	780421718	1030303882	F	1		0
1047494755	.	554578059	F	1
1047976516	815813209	539748582	F	1
1048773647	539303032	1004387770	F	1
1049250302	482879468	560115457	F	1		0
1049251717	744985598	797126955	F	1		0
1049251915	.	877947950	F	1
1049267576	412572327	548306567	F	1
1049707349	753526867	880368081	F	1
1049711082	734565466	973617168	F	1	7
1049711572	506927878	565425819	F	1
1049712068	719808029	866061527	F	1
1049714201	542186917	553737631	F	1
1049714858	395591972	545513326	F	1
1049721346	285974448	502280272	F	1
1050259788	594535737	862471136	F	1
1050270395	744042088	462473994	F	1		0
1050734941	770396600	546903322	F	1
1050740460	527067613	692412771	F	1
1051642075	438887362	509941857	F	1
1051650468	554464704	862480869	F	1
1052150056	.	553821009	F	1
1053133850	546089386	388305718	F	1
1053135954	.	970270722	F	1
1053140570	.	670582382	F	1		0
1053148339	248657247	548749456	F	1
1053573103	395585129	726955047	F	1
1053581602	693728959	458398679	F	1
1053989663	139799117	556725611	F	1
1054570976	855918015	395765430	F	1
1054572796	363633136	864639412	F	1
1054588571	783990340	670022612	F	1
1055020720	398179849	550206756	F	1
1055022067	549955361	684237250	F	1
1055025703	108376528	560650505	F	1
1055957789	494889123	585847884	F	1		0
1056717262	676233762	883288451	F	1
1057209779	729324789	490424223	F	1
1057210472	749616214	865533127	F	1
1057232605	843816954	764098713	F	1
1058127286	415987749	448475145	F	1
1058127619	.	555047424	F	1		0
1058134943	490044577	542061736	F	1		0
1058140836	.	499301609	F	1
1059177228	383832490	588982635	F	1
1059177630	372406892	565652311	F	1
1059182410	737027395	460278414	F	1
1059989194	816229303	256086408	F	1
1060492430	739049642	579890782	F	1		0
1060495068	482838451	707581358	F	1		0
1060496122	744098093	575524119	F	1
1060887439	604779566	582277225	F	1		0
1060887622	872609618	438360807	F	1
1061353836	944345481	689038013	F	1		0
1061852797	534639663	753018024	F	1		0
1061854759	766578624	869397982	F	1		0
1061855770	593256429	871610432	F	1		0
1061861031	666251874	545853722	F	1
1061864443	688991152	493224271	F	1
1061866238	534639663	555925224	F	1
1061868465	108377343	555041065	F	1
1062316404	817069803	375066919	F	1
1062323156	678779540	788884659	F	1
1062331300	671623658	553794384	F	1
1062334861	497205835	400846620	F	1
1062776399	514799866	407058995	F	1		0
1063258046	514796697	822313936	F	1
1063262425	552729052	545221495	F	1
1063270471	807764216	856643827	F	1	7
1063742059	616456052	533415030	F	1
1063754840	576536000	544624042	F	1
1064253545	749616214	869040875	F	1
1064255220	388689487	492026983	F	1
1064270821	.	545863661	F	1
1064751900	536708126	545198016	F	1
1064756218	577204958	548311386	F	1
1064763633	393233077	670034731	F	1
1064769319	.	682969804	F	1
1065168676	562850272	542663706	F	1
1065665227	585600763	585600995	F	1	7
1067463179	865233688	555535793	F	1
1068791286	554756486	678423598	F	1
1069211048	542988898	866889767	F	1		1
1069211457	707385876	952548535	F	1		0
1069212699	108379308	708223079	F	1
1069746941	607352885	117477513	F	1
1072263157	611863822	733902452	F	1		0
1072264139	616961927	548289695	F	1
1073313005	869796347	551094115	F	1
1073313370	.	502662138	F	1
1073313493	.	677633419	F	1
1073327980	860142279	452527771	F	1
1074767589	534639663	800049503	F	1		1
1074769675	481262433	883665232	F	1		0
1075256446	856620165	473549483	F	1
1076059699	882143282	551067969	F	1
1077672817	462018378	551711397	F	1
1079767626	.	747728244	F	1
1079924517	.	549148288	F	1
1080616432	.	713414183	F	1		0
1080616631	983795575	983796167	F	1	7
1081342927	483758810	583271822	F	1
1081346213	581968136	450123644	F	1
1084614368	.	780227826	F	1
1085981350	.	565621071	F	1
1087542002	.	565621072	F	1
1088491763	700500367	439370628	F	1
1088493458	580119428	592428488	F	1
1088494017	450103125	373693975	F	1
1089823597	783282687	616962885	F	1
1090128824	847954157	441782316	F	1
1093418059	108900412	578243367	F	1
1099619193	717418947	815133709	F	1		0
1103531079	272364646	604424731	F	1
1105239875	.	601323127	F	1
1105939030	716646107	278483557	F	1
1106236275	732991264	347012295	F	1
1111715780	573989623	520077020	F	1
1117336081	108375754	764896847	F	1		0
1118642371	745662598	983796170	F	1
1121450292	.	549154657	F	1
1124380356	492313521	410153193	F	1
1129903729	716646098	571499034	F	1
1133867654	488157968	395250939	F	1		0
1134272461	888988603	782508838	F	1
1134663809	621328729	553197127	F	1		0
1136110245	737026653	902504849	F	1
1136116911	735355039	345924913	F	1
1136548911	669829266	563612535	F	1		0
1138110400	862479285	501720516	F	1
1138412630	887244063	574541113	F	1
1138797003	1058139545	546443137	F	1
1139612375	.	809190195	F	1		0
1140423646	497205835	496059500	F	1
1140843339	496900978	562090972	F	1
1144283010	841131512	545859923	F	1
1144685468	272363339	886842343	F	1		0
1145636396	1035830444	554471985	F	1	7
1145641314	740023479	186674575	F	1
1145659182	.	492424690	F	1
1147506280	684223532	878579634	F	1		0
1147508594	.	489471097	F	1
1147518503	949896269	407977366	F	1
1148013136	917441798	549163545	F	1
1150375949	539303032	576074479	F	1		0
1151067236	952349979	769847041	F	1		0
1151086137	542988898	883077780	F	1		0
1151087023	743343383	821546594	F	1
1151602096	717272448	758894266	F	1		0
1153413008	.	546924377	F	1
1155561337	745662599	553629701	F	1
1155566145	1069215276	551683223	F	1		0
1155572151	905259733	405943527	F	1	7
1156684476	.	759202661	F	1
1157181427	860627488	879238757	F	1		0
1157185417	856966820	562238976	F	1
1158413227	949318815	734176043	F	1
1158954130	438462894	787952414	F	1
1158955469	911856493	734657650	F	1	7
1160638537	666020522	746724697	F	1		0
1163594068	621328729	391163881	F	1
1164445426	542988898	954212400	F	1		0
1165021021	760762919	185954454	F	1
1166290669	917084213	878917900	F	1		0
1167768179	439313877	552379218	F	1
1170366513	746989871	559576525	F	1		0
1170916621	621328729	879584880	F	1		0
1172193801	866065301	962645139	F	1		0
1173212811	815372263	896804249	F	1
1173214617	.	943601714	F	1		0
1174182699	717864847	860148072	F	1		0
1174699037	108376485	700494725	F	1	6	1
1180134996	614148978	362617156	F	1
1181401397	665265580	706755233	F	1		0
1184803496	892729091	555832674	F	1
1185223364	947782573	823483731	F	1		0
1186368217	656543940	452380048	F	1
1187106823	552729052	715101058	F	1		0
1187107169	552729052	438461426	F	1
1192044169	520931260	494397328	F	1
1193638135	896802713	491845969	F	1
1194003960	541628973	1004678970	F	1
1194629001	987281610	556345628	F	1
1197903855	612537534	569615329	F	1		0
1198282910	780570342	480573318	F	1
1198283566	952353293	713414575	F	1		0
1198284177	749618811	688928330	F	1		0
1198698884	959638578	575502463	F	1
1202244113	475795228	682974471	F	1		0
1202246333	817069685	512432041	F	1	7
1202575947	490429636	588977951	F	1		0
1203279367	481262433	345646823	F	1
1203279373	542988898	979948191	F	1		0
1203279527	927631604	859211263	F	1		0
1203279935	734658336	770403914	F	1		0
1203665125	882788595	886845883	F	1		0
1203665746	902508674	583042111	F	1
1204035595	590975055	574986574	F	1		0
1204779942	723512991	552818373	F	1
1205168479	511091854	554568685	F	1
1205555971	555048530	927308886	F	1		0
1205557140	948225511	505981763	F	1
1205557596	358600365	555942992	F	1
1205557707	924727793	759842887	F	1
1205558466	874751435	869401837	F	1		0
1205930298	542988898	884537797	F	1		0
1206282724	539303032	878570806	F	1		0
1206282949	938791535	373374288	F	1
1206569617	.	574113653	F	1
1207463607	844081348	509180056	F	1
1207464333	947995119	556241619	F	1
1207465007	.	344803412	F	1
1207979121	856620111	568201456	F	1
1207980346	903360900	979556831	F	1		0
1207981699	695619895	893517717	F	1
1208586631	607351107	879239994	F	1
1208766063	935874417	472331633	F	1
1208766767	462043117	511748314	F	1
1209339761	861449641	671857207	F	1
1209340940	812322371	688936671	F	1
1209341854	.	353822747	F	1
1209638182	542988898	984999617	F	1
1209638266	862141605	491731579	F	1		0
1209638769	607352885	678418118	F	1		0
1209640456	751715165	551692480	F	1		0
1209963204	487901499	551670363	F	1
1210313775	767858929	901683250	F	1		0
1210314307	457221560	552808939	F	1		0
1210314359	610566156	587577706	F	1
1210502342	875602814	185975221	F	1
1211098217	588924072	611643331	F	1		0
1211098478	482838451	555280664	F	1		0
1211099110	274918368	449878628	F	1
1211100351	.	441012975	F	1
1211100411	.	551705744	F	1
1211467384	805938125	763802582	F	1
1211467584	545426503	966772231	F	1		0
1211469414	963258657	976404626	F	1		0
1211818053	934526925	617246907	F	1
1211819591	716646098	748201651	F	1		0
1212212761	841131512	956589495	F	1		0
1212212879	589839214	676710425	F	1
1212406631	511376909	754512277	F	1		0
1212407150	739877501	551088534	F	1
1212945332	585532069	1009680065	F	1
1213265241	872253366	521877291	F	1
1213265333	480556007	668119444	F	1		0
1213265970	944855017	397713053	F	1
1213267476	539972082	1073084800	F	1		0
1213596921	588735600	987280513	F	1		0
1213598167	926353344	763789282	F	1	7
1213598321	926353344	884553378	F	1	7
1213598966	1008298358	189197167	F	1
1214266967	689298104	545204766	F	1
1214267294	895326650	544628581	F	1	7
1214818276	859701785	847319781	F	1		0
1214820195	786546516	985563578	F	1		0
1215217232	999517200	952695182	F	1		0
1215219695	607352885	248601350	F	1
1215220482	.	1031496783	F	1
1215606213	874747101	718057061	F	1		0
1215608857	553201221	874760385	F	1
1216041175	944666076	431514986	F	1
1216043403	454404576	544107504	F	1
1216938775	966370236	435833225	F	1
1216939098	870521544	1008300961	F	1		0
1217370655	955671914	628520846	F	1		0
1217370656	955671914	955680064	F	1
1217372251	739877501	761321346	F	1
1217373915	744979311	983091132	F	1		0
1217808669	403781309	758886430	F	1
1217808930	716646098	940556698	F	1		0
1217810064	877955822	761333300	F	1		0
1218228176	944000928	549180129	F	1
1218228588	108379199	459989835	F	1
1218229288	108379199	427037772	F	1
1218230034	874377561	518601277	F	1
1219232588	441492680	550072437	F	1	7	0
1219232736	609042100	495828907	F	1
1219232737	609042100	495823811	F	1
1219232840	764899262	962647129	F	1		0
1219233737	542995254	867771849	F	1
1219235819	992602395	720860418	F	1	3	0
1219689728	676704140	546931453	F	1
1219691332	944000928	865535516	F	1		0
1220105831	545426503	985290241	F	1		0
1220106240	555445796	671286575	F	1		0
1220106353	954574201	707899413	F	1
1220505258	545426503	1004932083	F	1		0
1220505259	805938125	617413802	F	1		0
1220505261	394040610	528245786	F	1
1220781809	761941077	519823984	F	1
1221577064	454753336	575344875	F	1		0
1221577769	542988898	941482815	F	1		0
1221578167	538842922	515521083	F	1
1221578806	944000928	460881205	F	1
1221578915	585857900	795049239	F	1		0
1222094144	.	353920568	F	1
1222096377	542988898	953045383	F	1		0
1222921305	905513250	775089293	F	1	7
1222923274	542988898	948980787	F	1		0
1222923332	784813803	706236660	F	1		0
1222923618	905513250	554598537	F	1	7
1222923723	.	576605511	F	1
1224193475	.	579434777	F	1		0
1224193687	856969864	871607712	F	1		0
1224722832	594535737	862749079	F	1
1224723126	.	581232171	F	1
1224724154	749616214	925302194	F	1
1225207782	628521727	550159894	F	1
1225520435	1004572232	356331215	F	1	7
1225521187	.	587441653	F	1
1225521528	351765340	574090466	F	1
1225521928	694170420	729508578	F	1		0
1226290071	853662469	560239607	F	1
1226290347	509893109	671779125	F	1		0
1226703601	926353344	463694919	F	1	7
1226704851	944665507	547838898	F	1
1226704948	754508251	454495172	F	1
1227131350	746723701	802643183	F	1		0
1227132213	192104457	385759652	F	1
1227613546	972359931	597634564	F	1
1228520049	971594384	622522387	F	1		0
1228520052	971594384	615490701	F	1		0
1228520547	192104457	566826195	F	1
1228522113	880682719	551694303	F	1
1228522616	542988898	958540422	F	1
1228936475	.	901360999	F	1		0
1228936839	907307758	499777173	F	1
1228937944	1021116936	959203607	F	1		0
1229277166	.	895325406	F	1
1229632654	917086374	982487004	F	1		0
1229633300	358875246	602519808	F	1
1229634099	389209487	358331930	F	1
1229634783	672182810	545874521	F	1
1229875177	.	887712718	F	1
1230584877	937522979	694980514	F	1		0
1230587498	737026653	862137855	F	1		0
1230587660	.	455586966	F	1
1231007442	186542125	965027477	F	1		0
1231395150	769846568	770399172	F	1
1231395680	509893109	704361128	F	1		0
1231663559	764708502	754629019	F	1
1231664454	924366005	685202200	F	1		0
1231665874	817266953	787690467	F	1		0
1231890555	688935490	545197996	F	1		0
1232672328	882143282	674924672	F	1
1232672704	955671914	733900686	F	1		0
1233200312	990582079	691515156	F	1
1233201727	787008843	677982104	F	1
1233539501	108376488	735683501	F	1
1234161985	542988898	960015454	F	1		0
1234162107	903364334	681722942	F	1		0
1234162155	977878425	1022503708	F	1		0
1234503992	842737804	734095898	F	1		0
1234504373	842737804	614874200	F	1		0
1235049067	939729907	616790567	F	1		0
1235331972	727874039	913255455	F	1		0
1235512662	512808280	555549329	F	1
1235513488	872101020	580778216	F	1
1235513668	727874039	987962713	F	1
1235513927	963248529	864330836	F	1		0
1236051755	785789115	855776543	F	1		0
1236051940	841132630	981018797	F	1
1236051943	841132630	1005697395	F	1
1236053184	786546516	891327234	F	1		0
1236388761	552730236	558257794	F	1
1236389782	108376400	467255480	F	1
1236389809	605973278	608660449	F	1
1236668175	928321220	968820728	F	1		0
1236669634	587993011	1035600693	F	1		0
1236670594	574545784	945820184	F	1		0
1236961928	993564939	1003713841	F	1		0
1236962224	555441034	577201818	F	1	7	0
1236962408	993564939	1003715062	F	1		0
1236962750	864631411	1012055253	F	1	7	0
1237706106	975499697	956045654	F	1		0
1237707667	526722929	117443479	F	1
1237989480	588233780	616091237	F	1		0
1237990468	882317565	738630427	F	1
1237990525	587157312	684689900	F	1
1238214288	823484008	582277862	F	1		0
1238353982	898930796	548292471	F	1
1238354717	406168337	437701397	F	1
1238544325	539303032	522940065	F	1
1238545289	823256794	783991795	F	1
1238732699	1007672671	841378310	F	1
1238956734	772920502	541019189	F	1
1239455831	.	576080934	F	1
1239547935	887232549	946048994	F	1		0
1239810851	542988898	981362952	F	1		0
1239969915	842739044	987685311	F	1		0
1239970173	942142306	543725913	F	1
1239972055	895324407	595506115	F	1
1240162222	841131512	764709768	F	1		0
1240164009	956970594	868152454	F	1		0
1240374439	582559862	373506261	F	1
1240374440	582559862	514359985	F	1		0
1240565358	496029022	543837778	F	1
1240565685	416246430	441791838	F	1
1240728780	882143282	1048774995	F	1		0
1240729925	943602505	560789131	F	1
1240730020	1015298171	991384920	F	1		0
1240961224	935872677	886843476	F	1		0
1240961709	842947388	738630085	F	1
1241272046	808222644	682888631	F	1
1241272689	744985598	855776053	F	1
1241275624	805938125	512915700	F	1		0
1241275627	805938125	512915628	F	1
1241275795	.	671121243	F	1
1241465562	713734714	988444077	F	1		0
1241466368	846939297	774461146	F	1
1241466451	1024555199	548288438	F	1
1241466740	.	544625267	F	1
1241644982	1036731912	988725738	F	1	7	0
1241645052	1132101754	544552350	F	1	4	0
1241798792	883273655	708069283	F	1
1241800333	372406892	951472441	F	1		0
1242002965	888988603	782508838	F	1
1242004881	577199450	551711175	F	1
1242007408	1021116936	944855623	F	1		0
1242207750	973177383	939925303	F	1	7	0
1242210403	549571532	554572502	F	1
1242211613	380174183	967238066	F	1		0
1242659110	894706805	446920435	F	1
1242917253	841131512	576081337	F	1		0
1242919843	979816110	476741933	F	1
1242922433	898346588	677166783	F	1	7	0
1242923023	761326118	1021401316	F	1
1242923037	967245523	982488239	F	1
1242923268	918587673	546866255	F	1
1243230155	248643272	579254793	F	1
1243230380	858587204	748646317	F	1		0
1243232479	542988898	927630806	F	1		0
1243531097	975086068	1039165349	F	1
1243531691	108376351	491194293	F	1
1243532869	763800695	587444592	F	1		0
1244049067	577199450	879581965	F	1		0
1244270725	847320720	774499037	F	1		0
1244602081	940697160	546433032	F	1
1244847801	585854422	559679722	F	1
1244849418	856620111	971255592	F	1		0
1244850031	665642380	496533599	F	1
1244852256	458483113	975494016	F	1
1244859126	844381341	451177546	F	1
1245144238	665773765	452078023	F	1
1245145092	816228588	788539057	F	1		0
1245146123	841368853	551083247	F	1
1245154161	1001239386	1043246024	F	1
1245442074	843159925	452077997	F	1
1245444707	872098845	71926611	F	1
1245444708	872098845	757544204	F	1		0
1245445807	953381742	1039529476	F	1
1245776992	917083716	577713315	F	1
1245780403	515853061	862137032	F	1
1245787654	472194414	601958604	F	1
1246198773	823864540	562099839	F	1
1246216051	485573737	527850357	F	1	7
1246218408	844081348	551066989	F	1
1246221476	954952137	1040178365	F	1	7	0
1246221807	492556389	749237492	F	1		0
1246224180	704670391	671024842	F	1
1246530144	754508251	1040948809	F	1
1246530685	779892157	549164801	F	1	7
1246533647	859701785	562238751	F	1
1246535059	944000928	544099378	F	1
1246536961	875586646	948233413	F	1		0
1246540347	1011206879	352099722	F	1
1246933629	622785717	547848541	F	1
1247275061	555048530	424405618	F	1
1247275119	1035595359	950741931	F	1
1247275955	566236727	546096082	F	1
1247277423	.	945565911	F	1		0
1247605757	542988898	970269684	F	1
1247608962	584478954	867782535	F	1	7	0
1247616159	.	783639877	F	1		0
1247621774	749255592	599575856	F	1	4	0
1247801551	534482302	459315427	F	1
1248008501	607352885	868806746	F	1		0
1248012115	564232717	894709004	F	1		0
1248019670	940696007	668867558	F	1		0
1248021577	945220025	1006270158	F	1		0
1248029167	500806039	939927205	F	1		0
1248030605	944000928	515862553	F	1		0
1248030645	841132630	911312293	F	1		0
1248033986	1013473407	548786510	F	1
1248034098	.	662630399	F	1		0
1248440979	805938125	856810318	F	1
1248440987	805938125	519654711	F	1		0
1248443867	1001712488	449243245	F	1	7
1248446039	849831142	855421783	F	1		0
1248447395	108374795	946045960	F	1		0
1248451163	843159746	794928910	F	1
1248452541	549955361	683472148	F	1
1248456556	850335483	543836893	F	1
1248847309	862753930	503063179	F	1
1249228587	870521163	703983121	F	1
1249576174	.	546918634	F	1
1249580098	907092866	672401190	F	1		0
1249581845	754764557	945572658	F	1
1249585152	767214038	607160587	F	1
1249590730	701859313	1048780885	F	1		0
1249591138	.	583039972	F	1		0
1249592900	677629069	880259305	F	1
1250041482	542988898	965034835	F	1		0
1250048888	744463500	949898161	F	1		0
1250053276	810531787	884549557	F	1		0
1250059315	401314216	396768578	F	1
1250067285	1038141837	859208066	F	1
1250068317	866600137	887696593	F	1		0
1250083778	843159925	863982938	F	1		0
1250548558	880685088	787687787	F	1		0
1250552014	772926466	710408119	F	1
1250553434	576534648	548742704	F	1
1250566808	.	1054001060	F	1
1250576318	116533178	570214204	F	1
1250997347	943602972	551692298	F	1
1251003122	922612300	753020160	F	1
1251003701	534481875	557030252	F	1
1251012050	915826420	622378615	F	1
1251013959	719996001	1005420069	F	1
1251014946	665534898	547839322	F	1
1251451923	887232549	560179433	F	1
1251452680	613506427	742431073	F	1	7
1251453000	882320975	686024172	F	1		0
1251456863	520088510	560782525	F	1
1251812842	817069685	984200996	F	1	7	0
1251812847	817069685	997373669	F	1	7
1251817243	878911493	1045896304	F	1
1251819754	948228172	956970641	F	1
1251820779	918807195	401358363	F	1	7
1251822527	669464164	770402190	F	1		0
1251827308	108380205	1044729860	F	1
1252296980	621328729	774496164	F	1
1252303434	868806811	447353279	F	1
1252303803	843244659	670019732	F	1
1252307263	.	545510982	F	1
1252313694	807980673	588436306	F	1		0
1252314589	497205835	717272236	F	1
1252315316	.	558488973	F	1
1252318052	1012052733	678210275	F	1	7
1252321389	1010024808	665797888	F	1
1252324892	1010023867	548297896	F	1	7
1252741903	886837817	552365953	F	1
1252743236	742429791	759187315	F	1
1252746260	307703088	605087590	F	1		0
1252748236	1015298197	555283748	F	1	7	0
1252749548	406560332	514146526	F	1
1252756049	883082903	678518862	F	1
1252761781	917986459	406129086	F	1
1252762173	621149230	320252059	F	1
1252762869	502104899	583578797	F	1	7
1253191470	748973981	555554719	F	1
1253196268	542988898	858801700	F	1
1253197950	116533178	551675486	F	1
1253199519	749616214	1017470211	F	1
1253200735	859701785	745941115	F	1
1253208070	481555965	363346252	F	1
1253208263	796081446	876552194	F	1
1253643334	716209179	613056395	F	1
1253644046	.	958527702	F	1		0
1253654987	1012733013	775402920	F	1	7	0
1253655616	1028307177	943839765	F	1
1253656153	916944538	549156668	F	1
1253996484	616456052	777316596	F	1		0
1253997425	895584197	992690584	F	1
1254007362	941111208	866585547	F	1		0
1254009542	250577522	579891292	F	1		0
1254011229	923793790	863985287	F	1		0
1254482206	607352885	397727364	F	1
1254483819	142912364	888805692	F	1	7	0
1254493129	562238183	720314398	F	1		0
1254498698	772926466	582558569	F	1
[truncated: 1,570 more rows]
